# Supplementary material for: Fabrication of magnetic bimetallic Fe3O4@Au–Pd hybrid nanoparticles with recyclable and efficient catalytic properties
Source: Royal Society of Chemistry journal article supplement (doi:10.1039/c6ra08602k), 2016-01-01
Supplement: c6ra08602k1.pdf [file c6ra08602k1.pdf]

## Electronic Supplementary Information

# Fabrication of magnetic bimetallic $\text{Fe}_3\text{O}_4@\text{Au-Pd}$ hybrid nanoparticles with recyclable and efficient catalytic properties

Qingdong Xia, Shanshan Fu, Guojuan Ren, Fang Chai, \* Jingjie Jiang \* and Fengyu Qu \*

*Key Laboratory of Design and Synthesis of Functional Materials and Green Catalysis, Colleges of Heilongjiang Province, College of Chemistry and Chemical Engineering, Harbin Normal University, Harbin 150025, P. R. China. E-mail: fangchai@gmail.com, jiangjingjie80@163.com, qufengyuchem@hrbnu.edu.cn*

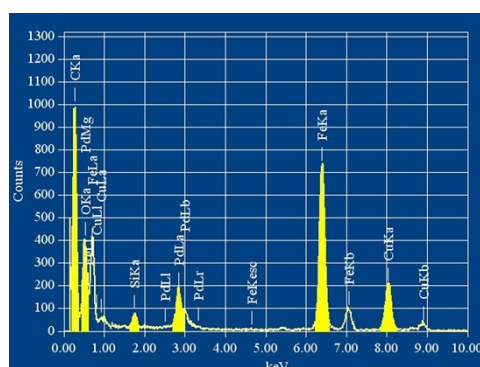

Fig. S1 EDS spectrum analysis of  $\text{Fe}_3\text{O}_4@\text{Pd}$  NPs.

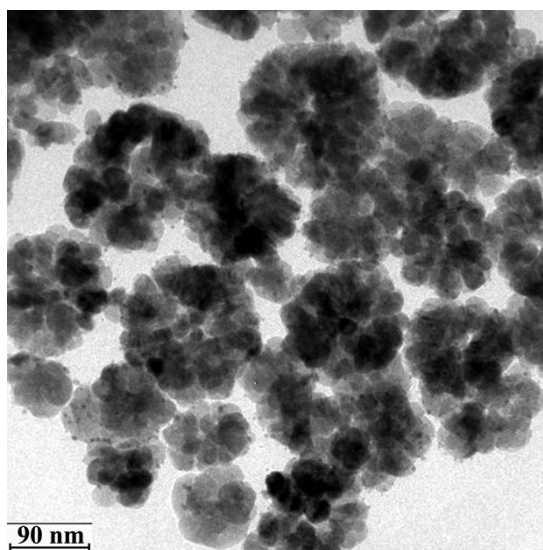

Fig. S2 TEM images of  $\text{Fe}_3\text{O}_4@Au$  nanoseeds.

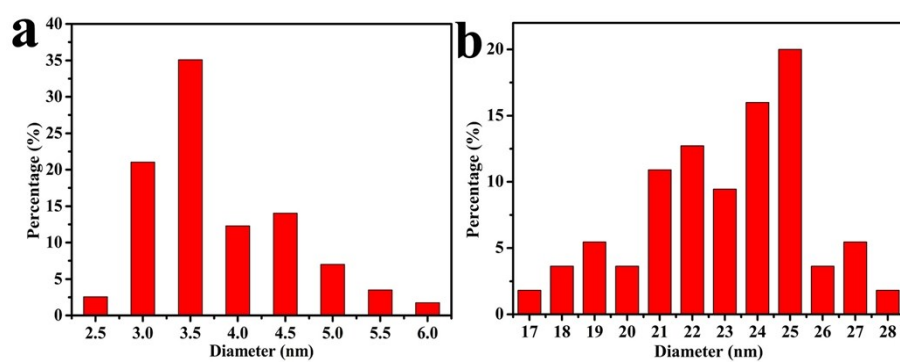

Fig. S3 The size distribution of Au NPs of (a)  $\text{Fe}_3\text{O}_4@Au$  nanoseeds and (b) Au-Pd NPs of  $\text{Fe}_3\text{O}_4@Au$ -Pd NPs.

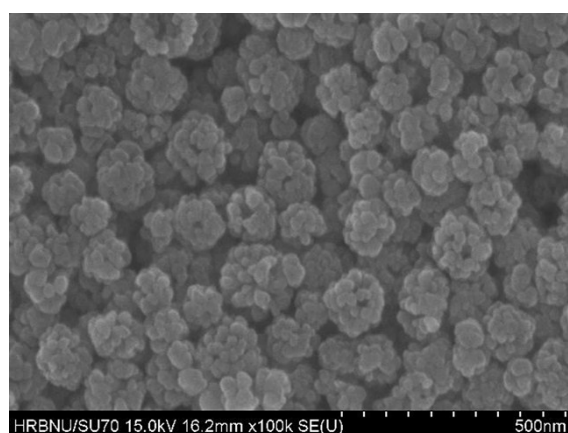

Fig. S4 SEM images of  $\text{Fe}_3\text{O}_4$  hollow spheres.

Specific surface areas of the samples were determined using N<sub>2</sub> adsorption–desorption isotherms at 77 k (Micromeritics TriStar II 3020) with the Brunauer–Emmett–Teller (BET) method. Fig. S5 shows the nitrogen adsorption desorption isotherms.

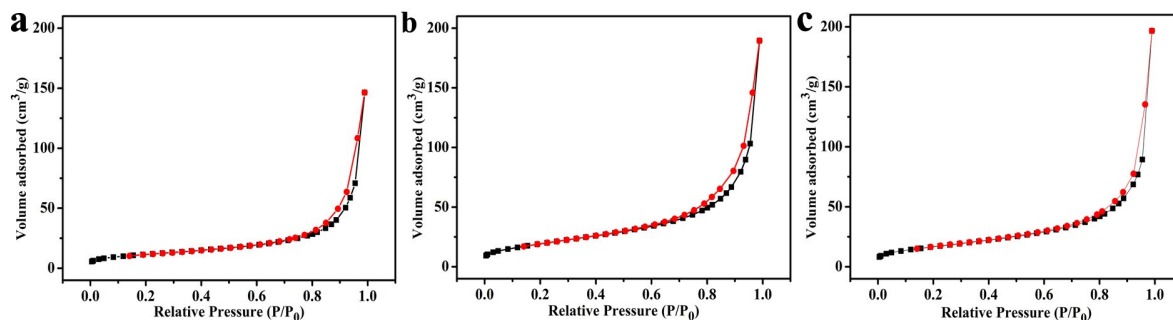

Fig. S5 N<sub>2</sub> adsorption/desorption isotherm of (a) Fe<sub>3</sub>O<sub>4</sub> hollow spheres, (b) Fe<sub>3</sub>O<sub>4</sub>@Pd NPs, (c) Fe<sub>3</sub>O<sub>4</sub>@Au-Pd NPs.

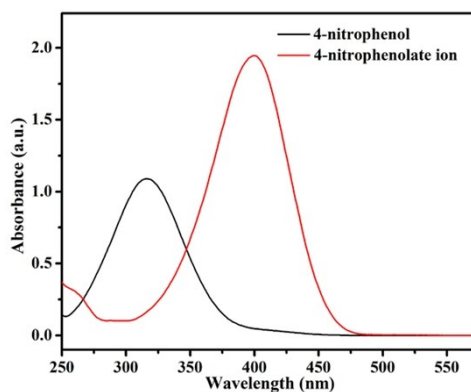

Fig. S6 The UV-vis characteristic peaks of freshly prepared 4-nitrophenol and 4-nitrophenolate ion aqueous solution at 317 and 400 nm, respectively.

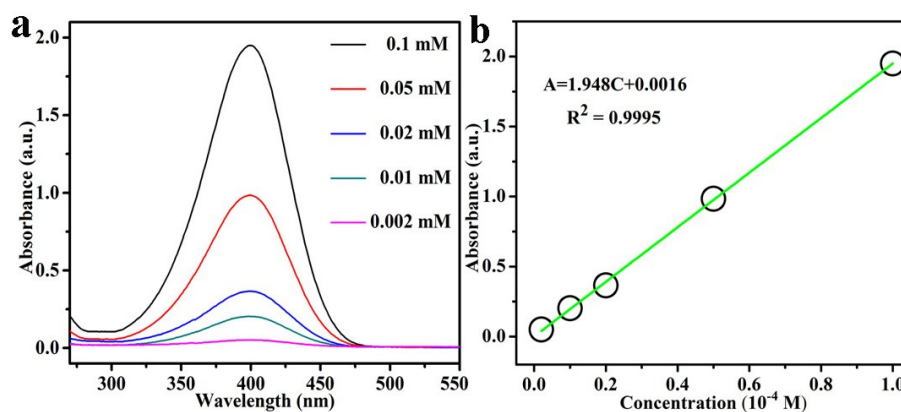

Fig. S7 (a) Absorption spectra of aqueous mixture solutions of 4-NP and NaBH<sub>4</sub> at different concentrations of 4-NP. (b) Plot of the peak absorbance against the concentration of 4-NP.

**Table S1** Rates of reaction and turnover frequencies (TOF)<sup>a</sup> for the reduction of 4-NP by catalyst.  
<sup>a</sup> The TOF is defined as the moles of reduced 4-NP molecules per mole of the surface noble metal atoms per second.

| Catalyst                                                                     | Type            | Rate constant (s <sup>-1</sup> ) | TOF <sup>a</sup> (s <sup>-1</sup> ) | References |
|------------------------------------------------------------------------------|-----------------|----------------------------------|-------------------------------------|------------|
| Fe <sub>3</sub> O <sub>4</sub> @Au-Pd NPs                                    | Supported       | 28.90 × 10 <sup>-3</sup>         | 8.78 × 10 <sup>-2</sup>             | This work  |
| Fe <sub>3</sub> O <sub>4</sub> @Pd NPs                                       | Supported       | 14.50 × 10 <sup>-3</sup>         | 3.28 × 10 <sup>-2</sup>             | This work  |
| Au-Pd carbon spheres                                                         | Nanocomposites  | 14.60 × 10 <sup>-3</sup>         | 3.37 × 10 <sup>-3</sup>             | 1          |
| Fe <sub>x</sub> O <sub>y</sub> /Pd@mSiO <sub>2</sub>                         | yolk-shell      | 1.60 × 10 <sup>-3</sup>          | 2.19 × 10 <sup>-3</sup>             | 2          |
| Pd/Fe <sub>3</sub> O <sub>4</sub> /polypyrrol                                | hollow capsules | 2.03 × 10 <sup>-3</sup>          | 1.47 × 10 <sup>-2</sup>             | 3          |
| Pd@Au CSNTPs                                                                 | core-shell      | 2.31 × 10 <sup>-3</sup>          | 2.46 × 10 <sup>-2</sup>             | 4          |
| PdAu/Fe <sub>3</sub> O <sub>4</sub>                                          | nanocomposites  | 5.47 × 10 <sup>-3</sup>          | 4.91 × 10 <sup>-2</sup>             | 5          |
| Fe <sub>3</sub> O <sub>4</sub> @SiO <sub>2</sub> @CeO <sub>2</sub><br>@Au-Pd | nanocomposites  | 4.0 × 10 <sup>-3</sup>           | 5.69 × 10 <sup>-2</sup>             | 6          |

References:

1. S. C. Tang, S. Vongehr, G. R. He, L. Chen and X. K. Meng, *J. Colloid. Interf. Sci.*, 2012, **375**, 125–133.
2. T. J. Yao, T. Y. Cui, X. Fang, F. Cui and J. Wu, *Nanoscale*, 2013, **5**, 5896–5904.
3. T. J. Yao, Q. Zuo, H. Wang, J. Wu, B. F. Xin, F. Cui and T. Y. Cui, *J. Colloid. Interf. Sci.*, 2015, **450** 366–373.
- 4 R. P. Zhao, M. X. Gong, H. M. Zhu, Y. Chen, Y. W. Tang and T. H. Lu, *Nanoscale*, 2014, **6**, 9273–9278.
- 5 Y. Tuo, G. F. Liu, B. Dong, J. T. Zhou, A. J. Wang, J. Wang, R. F. Jin, H. Lv, Z. Dou and W. Y. Huang, *Sci. Rep-UK.*, DO i: 10.1038/srep13515.
- 6 Q. Wang, W. J. Jia, B. C. Liu, A. Dong, X. Gong, C. Y. Li, P. Jing, Y. J. Li, G. R. Xu and J. Zhang, *J. Mater. Chem. A.*, 2013, **1**, 12732–12741.

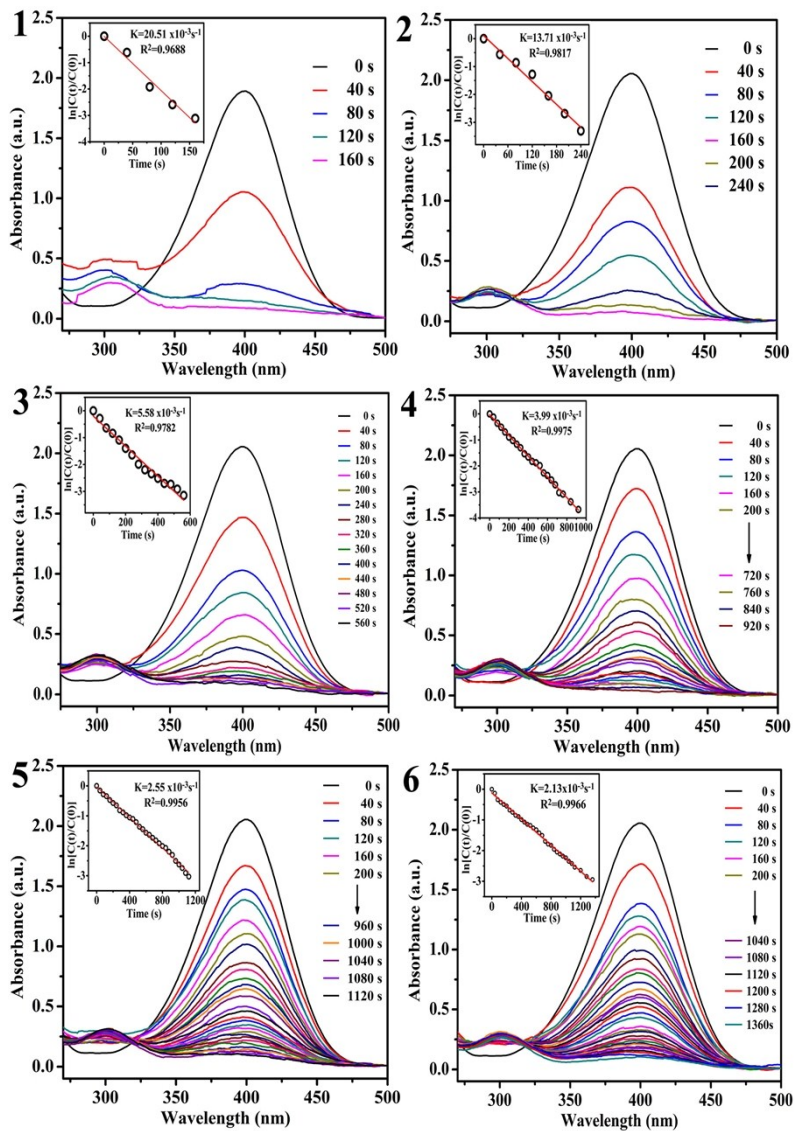

Fig. S8 The UV-vis spectra and kinetic rate of reduction of 4-NP by NaBH<sub>4</sub> under the catalysis of Fe<sub>3</sub>O<sub>4</sub>@Pd NPs for 1-6 times.

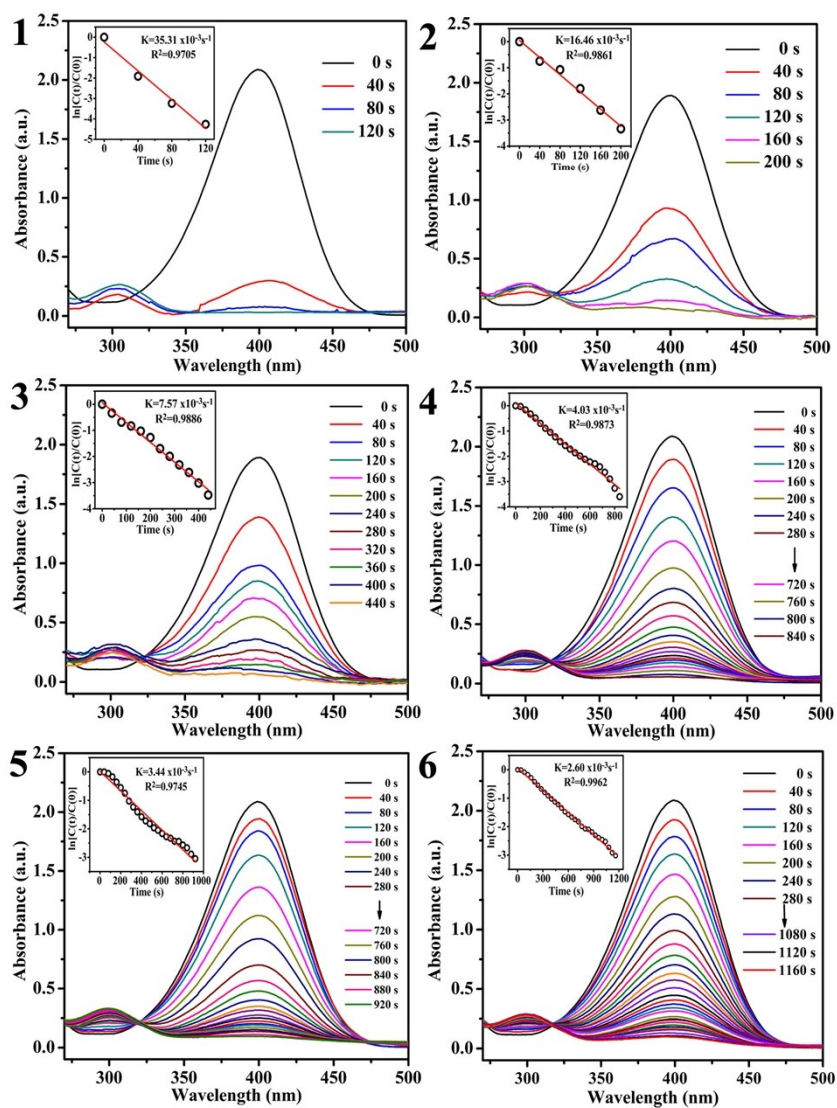

Fig. S9 The UV-vis spectra and kinetic rate of reduction of 4-NP by NaBH<sub>4</sub> under the catalysis of Fe<sub>3</sub>O<sub>4</sub>@Au-Pd NPs for 1-6 times.

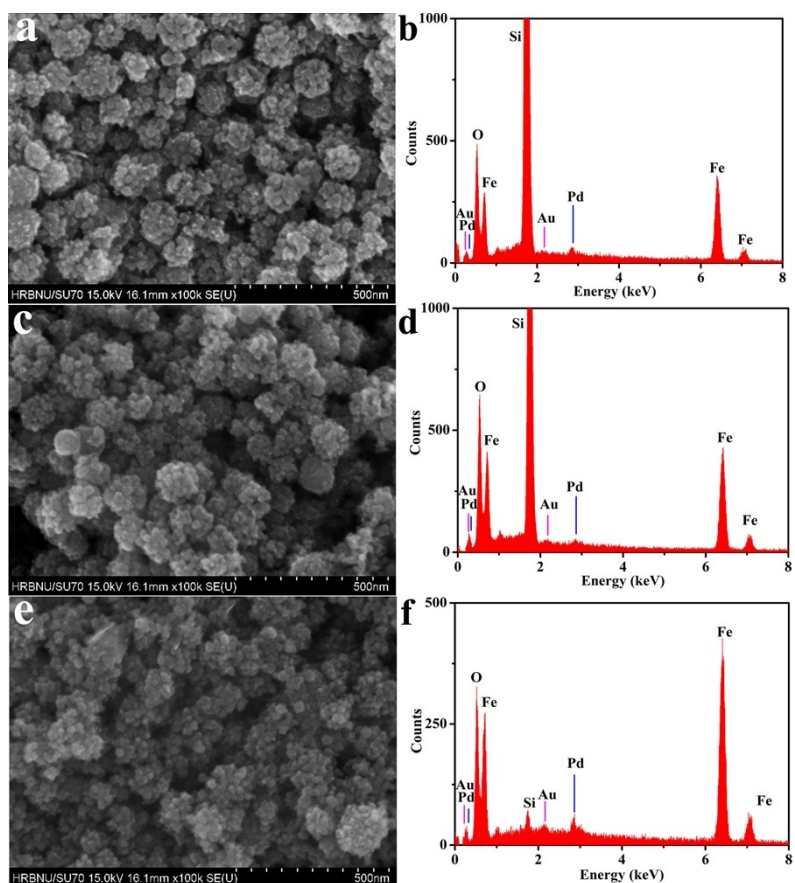

Fig. S10 The SEM (a, c, e) and EDX (b, d, f) of the  $\text{Fe}_3\text{O}_4@Au-Pd$  NPs as catalyst after reused 1<sup>st</sup>, 3<sup>rd</sup>, 6<sup>th</sup> times, respectively.

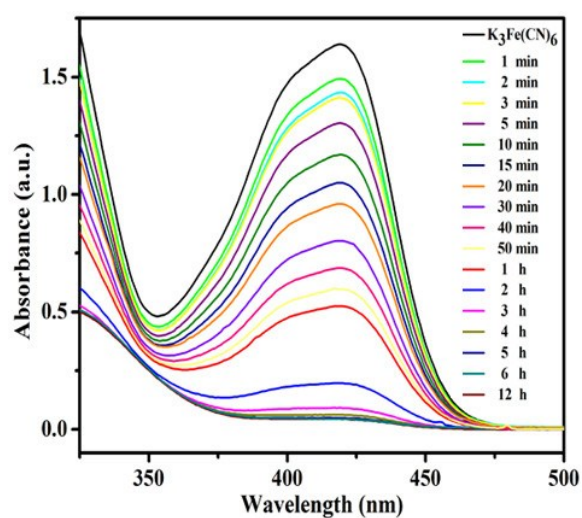

Fig. S11 UV-vis spectra of the reduction of  $\text{K}_3\text{Fe}(\text{CN})_6$  solution upon the addition of  $\text{NaBH}_4$  recorded at different times from 1 min to 12 h at 25°C,  $[[\text{Fe}(\text{CN})_6]^{3-}] = 3 \times 10^{-3}$  M,  $[\text{BH}_4^-] = 0.04$  M in the absence of catalyst.

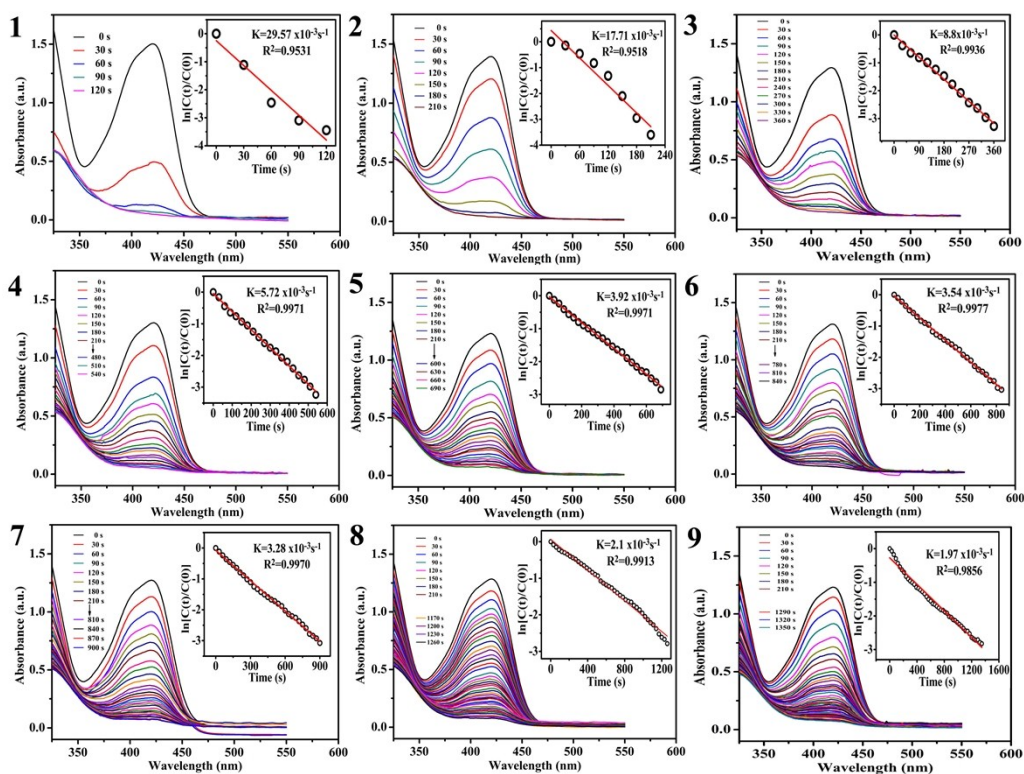

Fig. S12 The UV-vis spectra and kinetic rate of reduction of  $K_3Fe(CN)_6$  by  $NaBH_4$  under the catalysis of  $Fe_3O_4@Pd$  NPs for 1-9 times.

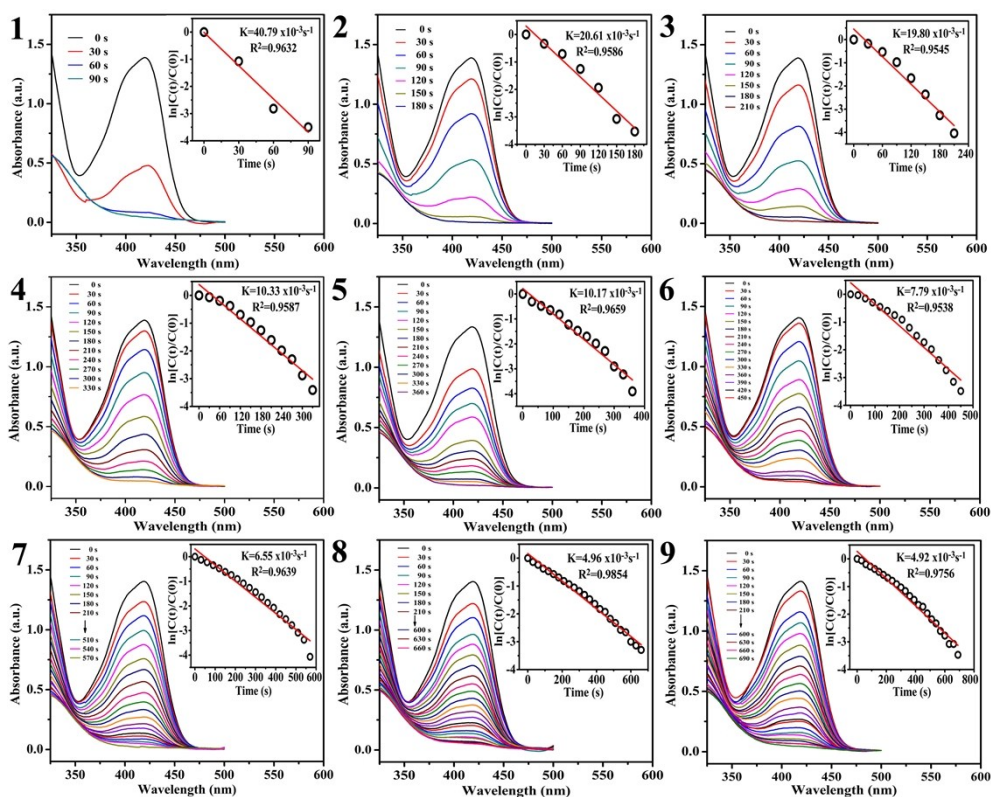

Fig. S13 The UV-vis spectra and kinetic rate of reduction of  $K_3Fe(CN)_6$  by  $NaBH_4$  under the catalysis of  $Fe_3O_4@Au-Pd$  NPs for 1-9 times.



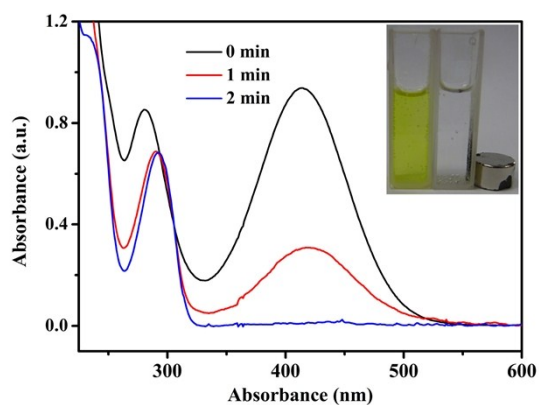

Fig. S14 UV-vis spectra of the reduction of 2-NP by  $\text{NaBH}_4$  in the presence of  $\text{Fe}_3\text{O}_4@Au-Pd$  NPs, (2 mL  $\text{H}_2\text{O}$ , 90  $\mu\text{L}$  10 mM 2-NP, 600  $\mu\text{L}$  0.5 M  $\text{NaBH}_4$ ).

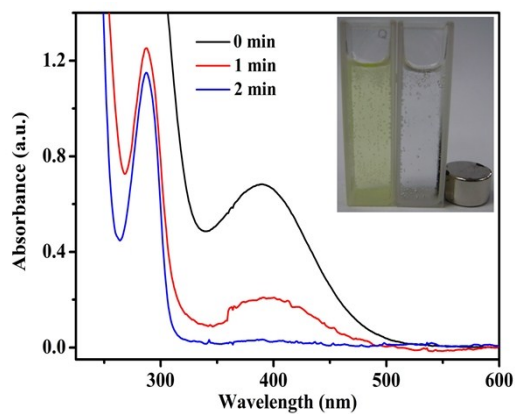

Fig. S15 UV-vis spectra of the reduction of 3-NP by  $\text{NaBH}_4$  in the presence of  $\text{Fe}_3\text{O}_4@Au-Pd$  NPs, (2 mL  $\text{H}_2\text{O}$ , 150  $\mu\text{L}$  10 mM 3-NP, 1 mL 0.5 M  $\text{NaBH}_4$ ).

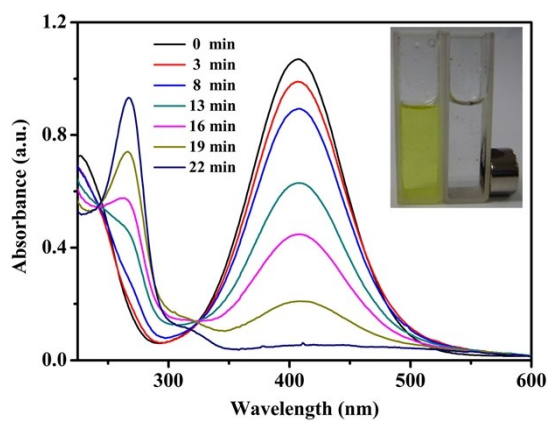

Fig. S16 UV-vis spectra of the reduction of 4-NTP by  $\text{NaBH}_4$  in the presence of  $\text{Fe}_3\text{O}_4@Au-Pd$  NPs, (2 mL  $\text{H}_2\text{O}$ , 25  $\mu\text{L}$  10 mM 4-NTP, 200  $\mu\text{L}$  0.5 M  $\text{NaBH}_4$ ).
